# Supplementary material for: LAND-SE: a software for statistically based landslide susceptibilityzonation, version 1.0
Source: Copernicus journal article supplement (doi:10.5194/gmd-9-3533-2016), 2016-10-04
Supplement: Supplementary file [file gmd-9-3533-2016-supplement-title-page.pdf › gmd-9-3533-2016-supplement-title-page.pdf]

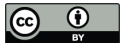

## *Supplement of*

# **LAND-SE: a software for statistically based landslide susceptibility zonation, version 1.0**

**Mauro Rossi and Paola Reichenbach**

*Correspondence to:* Mauro Rossi (mauro.rossi@irpi.cnr.it)

- gmd-9-3533-2016-supplement-title-page.pdf
- Example\_datasets
  - pixel\_Random\_validation\_entirearea
    - \* LAND-SE\_configuration.txt
    - \* LAND-SE\_configuration\_spatial\_data.txt
    - \* LAND-SE\_v1r0b30\_20160118.R
    - \* training.dbf
    - \* training.prj
    - \* training.sbn
    - \* training.sbx
    - \* training.shp
    - \* training.shx
    - \* training.txt
    - \* validation.dbf
    - \* validation.prj
    - \* validation.sbn
    - \* validation.sbx
    - \* validation.shp
    - \* validation.shx
    - \* validation.txt
  - polygon\_NS\_validation
    - \* LAND-SE\_configuration.txt
    - \* LAND-SE\_configuration\_spatial\_data.txt
    - \* LAND-SE\_v1r0b30\_20160118.R
    - \* training.dbf
    - \* training.prj
    - \* training.sbn

- \* training.sbx
- \* training.shp
- \* training.shx
- \* training.txt
- \* validation.dbf
- \* validation.prj
- \* validation.sbn
- \* validation.sbx
- \* validation.shp
- \* validation.shx
- \* validation.txt
- polygon\_Random\_validation\_entirearea
  - \* .Rhistory
  - \* LAND-SE\_configuration.txt
  - \* LAND-SE\_configuration\_spatial\_data.txt
  - \* LAND-SE\_v1r0b30\_20160118.R
  - \* training.dbf
  - \* training.prj
  - \* training.sbn
  - \* training.sbx
  - \* training.shp
  - \* training.shx
  - \* training.txt
  - \* validation.dbf
  - \* validation.prj
  - \* validation.sbn
  - \* validation.sbx
  - \* validation.shp
  - \* validation.shx
  - \* validation.txt

- LAND-SE\_UserGuide\_v3\_23sept2016.pdf

The copyright of individual parts of the supplement might differ from the CC-BY 3.0 licence.
